# Supplementary material for: Exploration of Reduced Doses and Short-Cycle Therapy for Darunavir/Cobicistat in Patients with HIV Using Population Pharmacokinetic Modeling and Simulations
Source: Springer Nature journal article supplement (doi:10.1007/s40262-020-00920-z), 2020-07-22
Supplement: MOESM1 [file 18205990]

**Title**

Exploration of reduced doses and short cycle therapy for darunavir/cobicistat in HIV patients using population pharmacokinetic modeling and simulations

**Journal**

Clinical Pharmacokinetics

**Authors**

Gabriel Stillemans1,2*, Leila Belkhir2,3, Bernard Vandercam3, Anne Vincent3, Vincent Haufroid2,4, Laure Elens1,2

1 Integrated PharmacoMetrics, PharmacoGenomics and PharmacoKinetics, Louvain Drug Research Institute, Université catholique de Louvain, Brussels, Belgium

2 Louvain centre for Toxicology and Applied Pharmacology, Institut de recherche expérimentale et clinique, Université catholique de Louvain, Brussels, Belgium

3 AIDS Reference Center, Department of Internal Medicine, Cliniques universitaires Saint-Luc, Université catholique de Louvain, Brussels, Belgium

4 Department of Clinical Chemistry, Cliniques universitaires Saint-Luc, Brussels, Belgium

*Corresponding author

Postal address: Avenue E. Mounier 72, B01.72.02, Brussels, Belgium

Phone number: +32 2 764 72 97

e-mail: gabriel.stillemans@uclouvain.be

# SUPPLEMENTARY MATERIALS

## Online Resource 1. DRV versus COB CL in dataset B


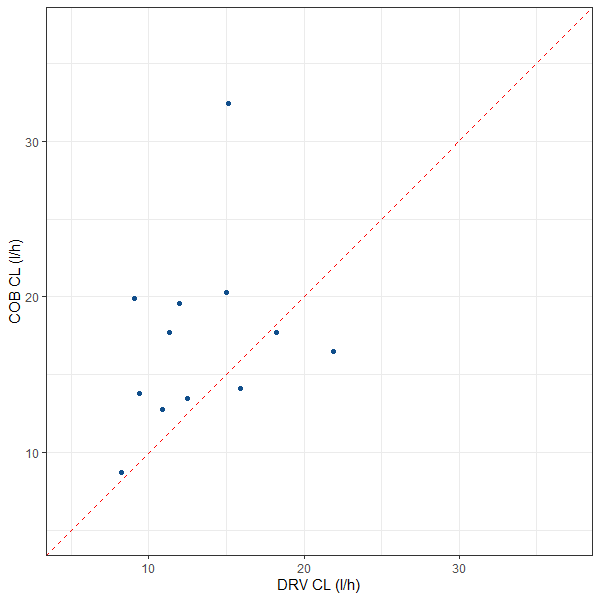


## Online Resource 2. Covariate selection process

| **Covariate** | **Parameter** | **Equation** | **DF** | **ΔOFV** | **p** |
| --- | --- | --- | --- | --- | --- |
| Forward search |  |  |  |  | < 0.05 |
| AAG | CL | Exponential | 1 | 30.64969 | 3.09×10-8 |
| AAG | V | Exponential | 1 | 14.45543 | 0.000144 |
| *SLCO3A1 G>T* | V | Categorical | 1 | 7.23055 | 0.007167 |
| Sex | CL | Exponential | 1 | 6.50959 | 0.010729 |
| *CYP3A5*3* | CL | Categorical | 1 | 7.60685 | 0.005815 |
| Backward search |  |  |  |  | < 0.01 |
| AAG | CL |  | 1 | -41.68951 | 1.07×10-10 |
| AAG | V |  | 1 | -12.77332 | 0.000352 |
| *SLCO3A1 G>T* | V |  | 1 | -8.01262 | 0.004645 |
| Sex | CL |  | 1 | -11.86488 | 0.000572 |
| *CYP3A5*3* | CL |  | 1 | -7.60685 | 0.005815 |

DF: degrees of freedom, ΔOFV: difference in objective function value.

Only covariates retained in the forward search are indicated, in their order of inclusion.

Associations tested:

- CL: Race, sex, *ABCB1* 1199G>A, *ABCB1* 3435C>T, *SLCO3A1* A>G, *SLCO3A1* G>T, *CYP3A4*22*, *CYP3A5*3*, age, body weight, albumin, AAG.
- V: Race, sex, *ABCB1* 1199G>A, *ABCB1* 3435C>T, *SLCO3A1* A>G, *SLCO3A1* G>T, body weight, albumin, AAG.
- ka: Fasting status with last dose.

## Online Resource 3. Outlier removal

| **#** | **Post-intake delay (h)** | **Concentration (mg.l-1)** | **Comment** |
| --- | --- | --- | --- |
| 1 | 18.13 | 9.178 |  |
| 2 | 4.6 | BLOQ |  |
| 3 | 12.33  13.42 | BLOQ  BLOQ |  |
| 4 | 22.25 | 7.563 |  |
| 5 | 3 | 2.361 | High AAG (2.66 g.l-1) |
| 6 | 2.75 | 2.214 | High AAG (2.2 g.l-1) |
| 7 | 3.42 | BLOQ |  |

AAG: Alpha-1 acid glycoprotein, BLOQ: Below limit of quantification.
